1 Peng Yu, PhD  
2 Department of Electrical and Computer Engineering & TEES-AgriLife Center for  
3 Bioinformatics and Genomic Systems Engineering,  
4 Texas A&M University,  
5 College Station, TX 77843, USA  
6 Tel: 1-979-845-7441  
7 Fax: 1-979-845-6259  
8 Email: [pengyu.bio@gmail.com](mailto:pengyu.bio@gmail.com)

9  
10 **Genome-wide transcriptome analysis identifies alternative splicing regulatory network and**  
11 **key splicing factors in mouse and human psoriasis**

12  
13 Jin Li<sup>1,2</sup> and Peng Yu<sup>1,2,\*</sup>

14 <sup>1</sup>Department of Electrical and Computer Engineering & <sup>2</sup>TEES-AgriLife Center for  
15 Bioinformatics and Genomic Systems Engineering, Texas A&M University, College Station, TX  
16 77843, USA

17 \*To whom correspondence should be addressed.

18  
19 **Running title:** Alternative splicing in psoriasis

20 **Keyword:** Alternative splicing; Splicing factor; Regulatory network; Psoriasis

21

22 **ABSTRACT**

23 Psoriasis is a chronic inflammatory disease that affects the skin, nails, and joints. For  
24 understanding the mechanism of psoriasis, though, alternative splicing analysis has received  
25 relatively little attention in the field. Here, we developed and applied several computational  
26 analysis methods to study psoriasis. Using psoriasis mouse and human datasets, our differential  
27 alternative splicing analyses detected hundreds of differential alternative splicing changes. Our  
28 analysis of conservation revealed many exon-skipping events conserved between mice and  
29 humans. In addition, our splicing signature comparison analysis using the psoriasis datasets and  
30 our curated splicing factor perturbation RNA-Seq database, SFMetaDB, identified nine candidate  
31 splicing factors that may be important in regulating splicing in the psoriasis mouse model dataset.  
32 Three of the nine splicing factors were confirmed upon analyzing the human data. Our  
33 computational methods have generated predictions for the potential role of splicing in psoriasis.  
34 Future experiments on the novel candidates predicted by our computational analysis are expected  
35 to provide a better understanding of the molecular mechanism of psoriasis and to pave the way for  
36 new therapeutic treatments.

37

## 38 **Introduction**

39 Psoriasis is a chronic inflammatory skin disease with symptoms of well-defined, raised, scaly, red  
40 lesions on skin. It is characterized by excessive growth and aberrant differentiation of epidermal  
41 keratinocytes. A number of known psoriasis susceptibility loci have been identified<sup>1</sup>, some of  
42 which are shared with other chronic inflammatory diseases<sup>2</sup>. Psoriasis also shares pathways with  
43 other diseases. For example, the interleukin-23 (IL-23) pathway and nuclear factor- $\kappa$ B (NF $\kappa$ B)  
44 pathway are associated with psoriasis<sup>3</sup>, while the IL-23 pathway is a therapeutic target of Crohn's  
45 disease<sup>4</sup>, and the dysregulation in the NF $\kappa$ B pathway contributes to Huntington's disease<sup>5</sup>. Despite  
46 great progress made over the past few years, the exact causes of psoriasis remain unknown<sup>6</sup>.

47 To discover the disease mechanisms, significant effort has been devoted to analyzing psoriasis  
48 gene expression. For example, in a study of small and large plaque psoriasis, microarray gene  
49 expression analysis revealed the up-regulation of genes in the IL-17 pathway in psoriasis. But the  
50 expression of genes in this pathway of small plaque psoriasis is significantly higher than that of  
51 large plaque psoriasis, and negative immune regulators like CD69 and FAS have been found to be  
52 down-regulated in large plaque psoriasis. This result suggests that the down-regulation of these  
53 negative immune regulators contributes to the molecular mechanism of large plaque psoriasis  
54 subtypes<sup>7</sup>.

55 As high-throughput sequencing becomes the mainstream technology, RNA-Seq has also been  
56 used for measuring gene expression to gain biological insights of psoriasis. For example, a recent  
57 RNA-Seq-based gene expression study of a large number of samples from lesional psoriatic and  
58 normal skin uncovered many differentially expressed genes in immune system processes<sup>8</sup>. The co-  
59 expression analysis based on this dataset detected multiple co-expressed gene modules, including  
60 a module of epidermal differentiation genes and a module of genes induced by IL-17 in

61 keratinocytes. This study also discovered key transcription factors in psoriasis and highlighted the  
62 processes of keratinocyte differentiation, lipid biosynthesis, and the inflammatory interaction  
63 among myeloid cells, T-cells, and keratinocytes in psoriasis.

64 The high resolution of RNA-Seq data allows for study of not only gene expression but also  
65 splicing in psoriasis. A recent analysis of psoriasis RNA-Seq data revealed around 9,000 RNA  
66 alternative splicing isoforms as a significant feature of this disease<sup>9</sup>. Another study showed that  
67 serine/arginine-rich splicing factor 1 (SRSF1) promoted the expression of type-I interferons (IFNs)  
68 in psoriatic lesions, and suppression of SRSF1 treated by TNF $\alpha$  in turn suppressed the expression  
69 of IFNs<sup>10</sup>. Despite the potentially important role that splicing plays in the mechanism of psoriasis,  
70 analyzing alternative splicing in psoriasis has received relatively little attention in the research  
71 community. To develop a better understanding of the disease mechanism of psoriasis, this study  
72 seeks to perform an integrative analysis to reveal missing information about splicing in psoriasis  
73 that will largely complement previous gene expression analysis.

74 To reveal the biological functions of the alternative splicing events in psoriasis, we performed  
75 multiple sequence alignment (MSA) between the sequences of mouse and human alternative  
76 splicing events, as the conserved splicing events are more likely to play similar roles in both  
77 species<sup>11,12</sup>. Our analysis revealed 18 conserved exon-skipping (ES) events between mice and  
78 humans. These conserved events are potential candidates for further functional study.

79 To identify the candidate splicing factors (SFs) that may be key regulators of splicing  
80 disruption seen in psoriasis, we created a database—called SFMetaDB<sup>13</sup>—of all RNA-Seq datasets  
81 publicly available in ArrayExpress<sup>14</sup> and Gene Expression Omnibus (GEO)<sup>15</sup> from gain or loss  
82 function studies of SFs in mice. Using the data source from SFMetaDB, we implemented a  
83 signature comparison method to infer the critical SFs for psoriasis. The splicing changes in a

84 psoriasis mouse model<sup>16</sup> and the SF perturbation datasets were used to derive the splicing  
85 signatures. By comparing the signatures of psoriasis datasets to the splicing signatures of our  
86 splicing signature database, we revealed nine candidate SFs that potentially contribute to the  
87 regulation of alternative splicing in psoriasis. Genes regulated by such key SFs are involved in a  
88 number of critical pathways associated with psoriasis. Our large-scale analysis provides candidate  
89 targets for the biology research community to experimentally test the role of splicing in psoriasis.  
90 These results underlie the importance of completing the transcriptome landscape at the splicing  
91 level and pave the way for more detailed mechanistic studies of psoriasis in the future.  
92

## 93 Results

### 94 Revealing large-scale changes in alternative splicing by analyzing RNA-Seq data from 95 psoriasis mouse model and human skin

96 To investigate the role of the splicing process in psoriasis, a psoriasis mouse model was studied  
97 first to detect splicing changes. In this mouse model, the gene *Tnip1* was knocked out<sup>16</sup>. Notably,  
98 *TNIP1* (the homologous gene of *Tnip1*) in humans is found in a psoriasis susceptibility locus<sup>17</sup>. It  
99 has been shown that *Tnip1* knockout (KO) mice exhibit macroscopical psoriasis-like phenotypes,  
100 such as redness and scaling, and microscopical psoriasis-like phenotypes, such as epidermal  
101 thickening, elongated rete-like ridges, papillomatosis, retention of nuclei within corneocytes, and  
102 infiltrations with different immune cell types<sup>16</sup>. To reveal splicing changes, the Dirichlet  
103 Multinomial (DMN) regression<sup>18</sup> was used to analyze the dataset from the *Tnip1* KO mouse model.  
104 Benjamini-Hochberg-adjusted<sup>19</sup> *p*-value and the percent spliced in (PSI,  $\Psi$ ) were estimated for  
105 seven types of splicing events (see **Methods**). Under  $|\Delta\Psi| > 0.05$  and  $q < 0.05$ , a total of 609  
106 differential alternative splicing (DAS) events were identified (**Table S1**). **Figure 1a** shows the  
107 number of DAS events for seven splicing types in the mouse model. To verify that the *Tnip1* KO  
108 mouse model recapitulated the main splicing features in human psoriasis, we performed a DAS  
109 analysis using RNA-Seq data from psoriasis patients and controls<sup>8</sup>. This DAS analysis identified  
110 606 DAS events ( $|\Delta\Psi| > 0.05$  and  $q < 0.05$ ) (**Table S1**). **Figure 1b** shows the number of DAS  
111 events for seven splicing types in the human psoriasis dataset. In addition, **Figure 2** and **Figure**  
112 **S1** show a few UCSC genome browser tracks of the example DAS events in *Exoc1/EXO1*, *Fbln2*  
113 */FBLN2*, *Fnbp1/FNBP1*, and *Atp5c1/ATP5C1* of mice/humans<sup>20</sup>.

114 Our DAS results revealed many significant splicing events in the psoriasis mouse model.  
115 **Figure 3** shows the heat map of PSI values for ES events in the *Tnip1* KO mouse model and in the

116 human psoriasis dataset. In the *Tnfr1* KO mouse model dataset, 64 splicing events have more  
117 inclusion of the variable exons in psoriasis, while 117 splicing events have less inclusion of the  
118 variable exons in psoriasis. In the human psoriasis dataset, 98 splicing events have more inclusion  
119 of the variable exons in psoriasis, while 119 splicing events have less inclusion of the variable  
120 exons in psoriasis. To reveal the biological functions of the genes with DAS events, gene ontology  
121 (GO) analysis (see **Methods**) was applied to detect the enriched GO terms for genes with DAS  
122 events in both the *Tnfr1* KO mice and the human psoriasis dataset (**Figure S2** and **Table S2**).  
123 Specifically, the GO term “regulation of wound healing, spreading of epidermal cells” was  
124 enriched in both mice and humans. The wound healing process is accelerated in psoriasis,  
125 suggesting the potential role of splicing changes in psoriasis<sup>21</sup>. In addition, the actin-filament–  
126 related GO terms “negative regulation of actin filament depolymerization” and “actin filament  
127 reorganization” were enriched in mice and humans, respectively. Dysregulation of actin filament  
128 is observed in psoriatic skins, indicating that splicing changes may contribute to the formation of  
129 psoriasis<sup>22</sup>. Therefore, our DAS analysis discovered large-scale splicing changes in psoriasis,  
130 providing feasible and promising new features to study the role of splicing in the pathogenesis of  
131 psoriasis.

### 132 **Revealing conserved splicing events in both mice and humans by splicing conservation** 133 **analysis**

134 To identify the most critical splicing changes in psoriasis, we conducted a splicing conservation  
135 analysis to reveal the splicing changes common to both the *Tnfr1* KO mouse model dataset and  
136 the human psoriasis dataset. By mapping mouse and human gene symbols using HomoloGene<sup>23</sup>,  
137 we detected 89 homologous genes with DAS events in both mice and humans (**Figure 4**). The  
138 Fisher’s exact test showed significant enrichment of the common homologous genes with  $p =$

139  $1.7 \times 10^{-32}$  (see **Methods**). This supports the conclusion that there is commonality in splicing  
140 underlying psoriasis in both mice and humans.

141 To further characterize the conservation of splicing in mice and humans, we compared the  
142 isoform sequences between them. By the splicing conservation analysis at the isoform level (see  
143 **Methods**), we ended up with 24 homologous genes with conserved isoform sequences for the  
144 common splicing events in human and mouse gene annotation (**Supplemental Data S1, Table**  
145 **S3**). The high proportion of conserved isoform sequences for the common splicing events (24 of  
146 33) suggested feasible and promising conservation of splicing changes between the *Tnip1* KO  
147 mouse model dataset and the human psoriasis dataset (see the representative MSA of  
148 *Exoc1/EXOC1* in **Supplemental Document S1**).

149 To identify the splicing features in psoriasis, we further evaluated whether the common  
150 splicing events were conserved in the same isoform between the *Tnip1* KO mouse model dataset  
151 and the human psoriasis dataset. Specifically, we checked whether the splicing events shared the  
152 same inclusion pattern of variable exons in mouse and human. We ended up with 18 alternative  
153 splicing events conserved in the same isoform, which means that the splicing events have more or  
154 less inclusion of variable exons in the same way between the two species (**Table 1**). The  
155 corresponding 18 homologous genes with conserved alternative splicing events include *ABII*,  
156 *ARHGAP12*, *ATP5C1*, *CTTN*, *DNMIL*, *EXOC1*, *FBLN2*, *FNBPI*, *GOLGA2*, *GOLGA4*, *MYH11*,  
157 *MYL6*, *MYO1B*, *PAM*, *SEC31A*, *SLK*, *SPAG9*, and *ZMYND11*. The MSA results for the 18  
158 common spliced genes can be found in **Supplemental Data S1** and **Table S3**. Of the 18 conserved  
159 splicing events, eight were largely spliced in both species, with over 10% PSI differences (**Table**  
160 **1**). **Figure 2** and **Figure 1S** show the conserved splicing events in *Exoc1/EXOC1*, *Fbln2/FBLN2*,  
161 *Fnbp1/FNBPI*, and *Atp5c1/ATP5C1* using the UCSC genome browser tracks<sup>20</sup>. Our conservation



162 analysis identified the 18 conserved splicing events, suggesting that the splicing features in the  
163 psoriasis mouse model dataset can be recapitulated in the human psoriasis dataset, and further, the  
164 18 conserved splicing events can be promising targets to follow to study the splicing mechanism  
165 in psoriasis.

### 166 **Revealing candidate splicing factors regulating splicing in psoriasis by splicing signature** 167 **analysis in mouse**

168 To further elucidate the splicing mechanism in psoriasis, we conducted SF screening to discover  
169 the candidate SFs that may regulate large-scale splicing events in psoriasis. Because a great  
170 number of splicing events are discovered in mouse psoriasis datasets, we hypothesize that SFs may  
171 play critical roles in the regulation of these events. To screen for the candidate SFs, we manually  
172 curated a list of RNA-Seq datasets with gain- or loss-of-function of mouse SFs<sup>13</sup> (see **Methods**).  
173 Using the datasets in SFMetaDB, we systematically compared the splicing changes in the psoriasis  
174 mouse model dataset with the effects of SF perturbation using a splicing signature comparison  
175 workflow (**Figure 5**, see **Methods**). Our splicing signature comparison approach screened the SF  
176 perturbation datasets related to a total 31 SFs for splicing regulators in the mouse psoriasis dataset,  
177 where nine SFs showed significant overlapping splicing changes in psoriasis, including NOVA1,  
178 PTBP1, PRMT5, RBFOX2, SRRM4, MBNL1, MBNL2, U2AF1, and DDX5 (**Table S4**), which  
179 are potential regulators responsible for splicing changes in psoriasis.

### 180 **Confirming the key splicing regulators in humans**

181 To confirm the importance of these nine SFs in mice, we performed a similar splicing signature  
182 comparison analysis in humans. Using the human homologous symbols of these nine mouse SFs,  
183 we curated on GEO<sup>15</sup> the human RNA-Seq datasets with these genes perturbed. Our curation  
184 resulted in four datasets for three of nine human SFs—GSE59884<sup>24</sup> and GSE69656<sup>25</sup> for PTBP1,

185 GSE66553 for U2AF1, and GSE76487<sup>26</sup> for MBNL1. The splicing signature comparison analysis  
186 (**Figure 5**, see **Methods**) using splicing signatures from the human psoriasis dataset and the four  
187 datasets of the three human SF perturbation showed significantly overlapped splicing changes  
188 between the human psoriasis dataset and the SF perturbation datasets of three human SFs— i.e.,  
189 PTBP1, U2AF1, and MBNL1 (**Table S4**). These results suggest the important role of these three  
190 SFs in potentially regulating splicing in psoriasis.

### 191 **Revealing potential candidate SFs that regulate splicing in psoriasis using conserved splicing** 192 **events in SF perturbation datasets**

193 To identify the potential SFs that regulate the conserved splicing events in psoriasis, we  
194 investigated the consistency of regulation direction of splicing events in the mouse/human dataset  
195 and the SF perturbation datasets. The 18 conserved ES events were significantly conserved in the  
196 *Tnfr1* KO mouse model dataset and the human psoriasis dataset, indicating the key spliced genes  
197 in psoriasis. Upon checking whether the splicing events were positively/negatively regulated by  
198 the SF in the same way in the SF perturbed datasets and the psoriasis datasets (**Figure 5b**), we  
199 ended up with 12 SFs (CELF1, CELF2, DDX5, MBNL1, MBNL2, NOVA1, PRMT5, PTBP1,  
200 RBFOX2, SF3A1, SRRM4, and U2AF1) potentially regulating 13 splicing events (*Abil*,  
201 *Arhgap12*, *Atp5c1*, *Ctnn*, *Exoc1*, *Fbln2*, *Golga2*, *Golga4*, *Myl6*, *Pam*, *Sec31a*, *Spag9*, and  
202 *Zmynd11*) in the *Tnfr1* KO mouse model dataset and three SFs (PTBP1, U2AF1, and MBNL1)  
203 potentially regulating five splicing events (*ABII*, *CTTN*, *GOLGA2*, *MYL6*, and *PAM*) in the human  
204 psoriasis dataset. The detailed candidate splicing regulation of SFs is shown in **Table S5**. These  
205 results show the potential SFs that may regulate splicing events in psoriasis.

206

## 207 **Discussion**

208 In this work, we implemented a systems biology approach based on a large-scale computational  
209 analysis to generate a biological hypothesis about the potential role of splicing in psoriasis using  
210 psoriasis mouse and human datasets, as well as a database of RNA-Seq data with perturbed SFs.  
211 This large-scale analysis suggests 18 conserved ES splicing events in psoriasis, along with several  
212 candidate SFs, that may regulate splicing in psoriasis.

213 Previous studies have shown the potential roles of splicing in the pathogenesis of psoriasis.  
214 For example, an isoform of *TRAF3IP2* with a mutation may cause the formation of psoriasis. The  
215 *TRAF3IP2* gene is an essential adaptor in the IL-17 signaling pathway contributing to psoriasis.  
216 The exon-2-excluded isoform of *TRAF3IP2* loses its ability to transduce IL-17 signals to regulate  
217 downstream gene expression when there is a specific amino acid substitution at the N terminus of  
218 this isoform. The expression of this mutated isoform may promote overproduction of IL-22 and  
219 IL-17. Thus, alternative splicing with this mutation predisposes carriers to the susceptibility of  
220 psoriasis<sup>27</sup>.

221 As another example, the expression of an isoform of the *IL15* gene may inhibit the proliferation  
222 of keratinocyte in mouse skin. IL-15 is a cytokine that stimulates the proliferation of T-cells and  
223 natural killer cells. The exon-7-excluded isoform of *IL15* is minimally expressed in normal skin,  
224 but its expression can be induced by a point mutation in exon 7 of *IL15*. The expression of this  
225 isoform can reduce keratinocyte activation and inhibit infiltration of neutrophil into the dermis,  
226 producing a less-inflammatory response. Because *IL15* is within the PSORS9 psoriasis  
227 susceptibility locus, this work suggested a potential alternative splicing mechanism by which *IL15*  
228 contributes to the pathogenesis of psoriasis<sup>28</sup>.

229 Computational analysis has been shown to be a feasible and effective way to generate novel  
230 biological hypotheses. For example, a network reconstruction method was used to infer MPZL3  
231 as a key factor in the mitochondrial regulation of epidermal differentiation<sup>29</sup>. As another example,  
232 a gene regulatory network analysis was applied to identify MAF and MAFB as the key  
233 transcription factors in epidermal differentiation<sup>30</sup>. We performed DAS analysis on the publicly  
234 available psoriasis mouse model dataset<sup>16</sup>. The large-scale DAS changes in the *Tnfr1* KO samples  
235 compared with wild-types provided a feasible discovery of the key splicing features in psoriasis.  
236 To facilitate the discovery of the key splicing events in psoriasis, we also performed DAS analysis  
237 on a publicly available human psoriasis dataset<sup>8</sup>. The sharing of a large number of differential  
238 splicing events between the two species underlies the potential importance of splicing in psoriasis.  
239 The subsequent MSA analysis of the isoform sequences strengthened the discovery of the  
240 conserved splicing events in psoriasis. In addition, the splicing signature comparison workflow  
241 was applied to infer the potential candidate SFs that may regulate splicing changes in psoriasis.  
242 These computational analyses suggest the critical role that alternative splicing may play in  
243 psoriasis.

244 Our results suggest the potential contribution of selected splicing events in the mechanism of  
245 psoriasis. From MSA analysis, we detected 18 conserved genes sharing a common splicing pattern  
246 between the *Tnfr1* KO mouse model dataset and the human psoriasis dataset, several of which can  
247 be potentially critical in psoriasis. For example, Exocyst complex component 1 (*Exoc1*) gene is a  
248 component of exocyst complex that determines the docking sites for targeting exocytic vesicles of  
249 the plasma membrane. The components of exocyst complex have been demonstrated as critical to  
250 angiogenesis<sup>31</sup>. As another example, Fibulin-2 (*Fbln2*) is a gene in the fibulin family that encodes  
251 an extracellular matrix protein, which plays an important role during organ development. The

252 extracellular matrix molecules and extracellular matrix remodeling regulate angiogenesis<sup>32</sup>. Since  
253 angiogenesis is critical for the progression of psoriasis<sup>33</sup>, our results suggest a putative role of the  
254 splicing of *Exoc1* and *Fbln2* in psoriasis.

255 Our conservation analysis also identified that abl-interactor 1 (*Abil*) shares a similar change in  
256 alternative splicing between mice and humans. The RNA expression of *ABII* is universally  
257 identified in human tissues, and the protein ABI1 is expressed particularly high in human skin  
258 cells<sup>34</sup>. *Abil* modulates the epidermal growth factor receptor pathway substrate 8 (*Eps8*) to regulate  
259 the remodeling of actin cytoskeleton architecture<sup>35</sup>. Abnormal actin cytoskeleton organization may  
260 occur in keratinocytes of lesional psoriatic skin<sup>22</sup>, suggesting a potential role of *Abil* in forming  
261 psoriasis. As another identified regulator, cortactin (*CTTN*) is expressed in all human tissues, and  
262 the protein CTTN is highly expressed in human skin cells<sup>34</sup>. The depletion of *Cttn* represses  
263 keratinocyte growth factor receptor (KGFR) internalization and polarization, inhibiting cell  
264 migration<sup>36</sup>. Notably, the migration of epidermal Langerhans cells is inhibited in chronic plaque  
265 psoriasis<sup>37</sup>. Our analysis identified a conserved splicing pattern in *Cttn*, suggesting the potential  
266 contribution of the alternative splicing of *Cttn* to psoriasis. As another example, the splicing pattern  
267 of STE20-like kinase (*Slk*) was strongly conserved ( $\Delta\Psi > 10\%$ ) between mice and humans. Since  
268 cell migration is inhibited in psoriasis<sup>37</sup>, the splicing changes of *Slk* may contribute to psoriasis by  
269 affecting cell migration<sup>38</sup>. The above results of our conservation analysis demonstrate that splicing  
270 changes potentially affect several processes related to psoriasis. Particularly, the extracellular  
271 matrix mediates immune response<sup>39</sup>, the actin cytoskeleton plays a critical role in nearly all stages  
272 of immune system functions<sup>40</sup>, and the cell migration process belongs to innate immune cell  
273 functions<sup>41</sup>. Therefore, the dysregulation of these processes may result in immune dysregulation,  
274 leading to the formation of psoriasis.

275 In addition, our splicing signature comparison analysis identified a number of potential SF  
276 contributors to psoriasis. Despite the fact that most of them have not been previously linked to  
277 psoriasis in the literature, it has been shown that the repression of *Ptbp1* can lead to skin  
278 developmental defects<sup>42</sup>, highlighting that alternative splicing events regulated by PTBP1 may  
279 contribute to psoriasis. Further study is required to fully elucidate the contribution to psoriasis  
280 from the splicing-mechanism point of view.

281 To underline the role of splicing changes in psoriasis, GO analysis of expression changes was  
282 conducted in comparison to splicing changes. Specifically, GO analysis for up-regulated genes in  
283 mice and humans identified skin-development-related GO terms (**Figure S3** and **Table S6**). For  
284 example, the GO terms “keratinization” and “cornified envelope” were enriched for up-regulated  
285 genes in both mice and humans. The aberrant proliferation of keratinocyte contributes to the  
286 development of psoriasis<sup>43</sup>, and cornified envelope is involved in skin development<sup>44</sup>, suggesting  
287 the role of expression changes in psoriasis. However, the GO term “regulation of wound healing,  
288 spreading of epidermal cells” was uniquely identified by the splicing changes but not expression  
289 changes in both mice and humans. Due to the role of the wound healing process in psoriasis<sup>21</sup>,  
290 splicing changes demonstrated their particular role in psoriasis. Furthermore, an additional GO  
291 analysis was performed using alternatively spliced genes as the foreground and up-regulated genes  
292 as the background. As a result, the wound healing process was also enriched (data not shown),  
293 suggesting that the splicing changes were overrepresented in expression changes in psoriasis.

294 Our computational analyses suggest a potentially important role of splicing in psoriasis, which  
295 needs be validated *in vivo* or *in vitro*. A number of DAS events identified in psoriasis were linked  
296 to psoriasis supported by literature evidence, and further experimental validation of significant  
297 predictions is expected to further strengthen the support of our discovery. The 18 conserved

298 splicing events identified in our DAS analysis can be good candidates for experimental validation.

299 In addition, *in vivo* experiments of the identified splicing regulators may provide a better  
300 understanding of how alternative splicing is disrupted in psoriasis.

301 In conclusion, our DAS analysis suggests a number of splicing events related to psoriasis  
302 conserved in mice and humans, as well as SFs that may be responsible for the regulation of splicing  
303 in psoriasis. These conserved splicing events and potential candidate SFs pave the way for the  
304 research community to study the role of splicing in psoriasis. The computational DAS analysis is  
305 a feasible and efficient way to generate biological hypotheses about the role of splicing in psoriasis.

## 306 **Methods**

### 307 **Differential alternative splicing analysis using RNA-Seq data**

308 To identify the DAS events, we performed DAS analysis for the *Tnfr1* KO mouse model  
309 dataset (GSE85891), where the *Tnfr1* KO mice and controls were treated for two days with  
310 imiquimod (IMQ)<sup>16</sup>, and for the human psoriasis dataset (GSE54456), where the human lesional  
311 psoriatic and normal skins established large-scale gene expression data<sup>8</sup>. We first aligned the raw  
312 RNA-Seq reads to mouse (mm9) or human (hg19) genomes using STAR (version 2.5.1b)<sup>45</sup> with  
313 default settings, and only uniquely mapped reads were retained for further analysis. The number  
314 of reads for each exon and exon-exon junction in each RNA-Seq file was computed by using the  
315 Python package HTSeq<sup>46</sup> with the annotation of the UCSC KnownGene (mm9 or hg19)  
316 annotation<sup>47</sup>. DMN was used to model the counts of the reads aligned to each isoform of each  
317 event<sup>18</sup>, and the likelihood ratio test was used to test the significance of the changes in alternative  
318 splicing between psoriasis samples and controls<sup>48</sup>. We calculated the *q*-values from the *p*-values  
319 in the likelihood ratio test by the Benjamini-Hochberg procedure<sup>19</sup>. The DAS events are classified  
320 into seven splicing types: Exon skipping (ES), alternative 5' splice sites (A5SSs), alternative 3'  
321 splice sites (A3SSs), mutually exclusive (ME) exons, intron retention (IR), alternative first exons  
322 (AFEs) and alternative last exons (ALEs). In addition, PSI was used to evaluate the percentage of  
323 the inclusion of variable exons relative to the total mature mRNA in the splicing events<sup>49</sup>. The PSI  
324 was originally defined for ES events. Here, its definition is expanded to describe the changes in  
325 splicing of all the splicing types in our DAS analysis. Specifically, the splicing event types ES,  
326 A5SS, A3SS, ME, and IR involve two isoforms where one isoform is longer. We calculated the  
327 PSI as the percentage usage of the longer isoform compared with both isoforms. For the splicing  
328 events AFE and ALE, we calculated PSI as the percentage of usage of the proximal isoform (the



329 isoform with the variable exon closer to the constitutive exon) relative to both isoforms of the  
330 event. The DAS events are identified under  $|\Delta\Psi| > 0.05$  and  $q < 0.05$ .

### 331 **Gene ontology analysis**

332 To examine the biological functions of the genes in the *Tnfr1* KO mice and the human psoriasis  
333 dataset, GO analysis was performed to screen for the enriched GO terms using Fisher's exact test<sup>50</sup>  
334 with the null hypothesis  $H_0$ : log odds ratio  $< 1$ . In the test of enriched GO terms for the genes with  
335 DAS events, these genes were taken as the foreground, and the expressed genes were taken as the  
336 background. To reveal the enriched GO terms for differentially expressed genes, specifically up-  
337 regulated genes were taken as the foreground and expressed genes were taken as the background.  
338 The estimated log odds ratio was also retained for overlapped GO terms. Enriched GO terms were  
339 identified under  $p$ -value  $< 0.05$ .

### 340 **Splicing conservation analysis**

341 To reveal the biological function of DAS events in psoriasis, we performed splicing  
342 conservation analysis between mice and humans. We first checked whether the homologous genes  
343 between the two species both had the DAS events. By mapping the human gene symbol to the  
344 mouse homologous gene symbol using HomoloGene<sup>23</sup>, we constructed a contingency table  
345 consisting of the counts of the homologous genes in both species with DAS events or in only one  
346 species with DAS events. Taking the homologous genes expressed in both mice and humans as  
347 the background genes, the Fisher's exact test was used to test the enrichment of common  
348 homologous genes with DAS events in both species.

349 Additionally, we compared the isoform sequences between mice and humans. Within the 89  
350 homologous genes with DAS events, 33 showed ES events in both species. To investigate the  
351 conservation of splicing changes in these 33 genes, we performed MSA analysis of the ES events

352 in these genes. We first extracted the two isoform sequences that cover each of the ES events—  
353 i.e., the upstream and downstream exons in the event are included in both isoforms, but the variable  
354 exon is included in only one of the isoforms. Within each homologous gene, we compared all the  
355 mouse-human splicing event pairs. In each comparison, we constructed an MSA of the translated  
356 protein sequences or the predicted mRNA sequences of the extracted isoforms in mice and humans  
357 using MAFFT<sup>51</sup>. For the coding events, we constructed the MSA for the translated protein  
358 sequences. Alternatively, for the events with noncoding isoforms, we built the MSA for the  
359 predicted mRNA sequences. The MSA results between the mouse and human isoforms revealed a  
360 commonality of splicing events between mice and humans.

### 361 **Mouse splicing factor perturbation database**

362 To screen for the candidate SFs that may regulate splicing in psoriasis, we curated a set of  
363 mouse RNA-Seq datasets with perturbed SFs. Our curated datasets were deployed as a database  
364 called SFMetaDB<sup>13</sup>, which hosts the full mouse RNA-Seq datasets with perturbed SFs (knocked-  
365 out/knocked-down/overexpressed). To curate the mouse SF perturbation database in SFMetaDB,  
366 we extracted 315 RNA SFs in GO (accession GO:0008380) for the mice<sup>50</sup>. For each SF, we used  
367 the gene symbol to search against ArrayExpress<sup>14</sup> for mouse RNA-Seq datasets. For the retrieved  
368 results from ArrayExpress, we performed manual curation of the dataset to make sure the SF was  
369 perturbed in the dataset. We ended up with 34 mouse RNA-Seq datasets for the perturbation of 31  
370 SFs. These 34 SF perturbation datasets provided the precious raw data for us to induce the  
371 candidate SFs that regulate splicing in psoriasis.

### 372 **Splicing signature–based connectivity map**

373 To identify the candidate SFs that regulate splicing events in psoriasis, we first determined  
374 whether the expression of SFs increased or decreased in the *Tnfr1* KO mouse dataset and the

375 human psoriasis dataset using the following procedure. The raw RNA-Seq reads were aligned to  
376 mouse/human genome using STAR, the same as the DAS analysis. The uniquely mapped reads  
377 were used to calculate the read-counts for each gene against the UCSC KnownGene annotation  
378 (mm9/hg19). A table of read-counts for all the genes and all the samples was created and  
379 normalized by DESeq<sup>52</sup>. The fold change calculated from this normalized count table was used to  
380 determine whether the expression of an SF increased or decreased.

381 Then, we checked how the splicing events were regulated by the SFs in the SF perturbation  
382 datasets by comparing these splicing events with the events in the psoriasis datasets. For example,  
383 if 1) a splicing event was positively regulated by an SF according to an SF perturbation dataset—  
384 i.e., the inclusion of the variable exon of the event was increased (**Figure 5a**) upon the  
385 overexpression of the SF or the inclusion of the variable exon of the event was decreased upon the  
386 knock-down/knock-out of the SF in the SF perturbation dataset (**Figure 5b**), and 2) the same  
387 variable exon was more included in psoriasis along with an increased expression of the SF or the  
388 same variable exon was less included in psoriasis along with a decreased expression of the SF, this  
389 consistency between 1) and 2) suggests that the event is likely regulated by the SF in psoriasis. If  
390 this consistency holds across a significantly large number of events, then the SF is likely a key  
391 factor responsible for the regulation of large-scale splicing changes in psoriasis. This consistency  
392 comparison approach was also used in CMap, a gene expression signature comparison method that  
393 has been widely used to detect the consistency between the gene expression signatures of a disease  
394 and the small-molecule or drug-treated samples<sup>53</sup>. Such a signature comparison method based on  
395 gene expression is powerful because some of the predictions have been validated *in vivo*<sup>54</sup>.  
396 However, most signature comparison approaches mainly focus on gene expression data and fail to  
397 detect fine-tuning of gene expression by splicing. To obviate the drawback in CMap, we applied a

398 splicing signature–based comparison method using splicing changes in the SF perturbation  
399 datasets and the psoriasis datasets (**Figure 5c**). We first calculated the splicing signatures for the  
400 34 SF perturbation datasets, where +/- indicates that an event is positively/negatively regulated  
401 by the given SF of the dataset and 0 indicates that no evidence exists that the event is regulated by  
402 the SF. Another signature vector made of +/-/0 was used to characterize the relation of an SF  
403 and the events in the psoriasis dataset. By comparing a signature from the SF perturbation dataset  
404 with a signature from the psoriasis data, a 3×3 contingency table was tabulated with rows and  
405 columns named +/-/0 and was used to see whether the two signatures match each other. To  
406 further check for the direction of the consistency, we collapsed the 3×3 table into two 2×2 tables  
407 so that the enrichment of ++ events and -- events, respectively, could be tested using Fisher's  
408 exact test (**Figure 5c**). The SFs with significantly enriched ++ events and -- events are the  
409 candidate SFs that regulate the splicing in psoriasis.

#### 410 **Data availability**

411 All data generated or analyzed during this study are included in this published article.

## 412 **References**

- 413 1 Tsoi, L. C. *et al.* Identification of 15 new psoriasis susceptibility loci highlights the role of  
414 innate immunity. *Nat Genet* **44**, 1341-1348, doi:10.1038/ng.2467 (2012).
- 415 2 Ellinghaus, D. *et al.* Analysis of five chronic inflammatory diseases identifies 27 new  
416 associations and highlights disease-specific patterns at shared loci. *Nat Genet* **48**, 510-518,  
417 doi:10.1038/ng.3528 (2016).
- 418 3 Nair, R. P. *et al.* Genome-wide scan reveals association of psoriasis with IL-23 and NF-  
419 kappaB pathways. *Nat Genet* **41**, 199-204, doi:10.1038/ng.311 (2009).
- 420 4 Teng, M. W. *et al.* IL-12 and IL-23 cytokines: from discovery to targeted therapies for  
421 immune-mediated inflammatory diseases. *Nat Med* **21**, 719-729, doi:10.1038/nm.3895  
422 (2015).
- 423 5 Trager, U. *et al.* HTT-lowering reverses Huntington's disease immune dysfunction caused by  
424 NFKappaB pathway dysregulation. *Brain* **137**, 819-833, doi:10.1093/brain/awt355 (2014).
- 425 6 Nestle, F. O., Kaplan, D. H. & Barker, J. Psoriasis. *N Engl J Med* **361**, 496-509,  
426 doi:10.1056/NEJMra0804595 (2009).
- 427 7 Kim, J. *et al.* Molecular Phenotyping Small (Asian) versus Large (Western) Plaque Psoriasis  
428 Shows Common Activation of IL-17 Pathway Genes but Different Regulatory Gene Sets.  
429 *The Journal of investigative dermatology* **136**, 161-172, doi:10.1038/JID.2015.378 (2016).
- 430 8 Li, B. *et al.* Transcriptome analysis of psoriasis in a large case-control sample: RNA-seq  
431 provides insights into disease mechanisms. *The Journal of investigative dermatology* **134**,  
432 1828-1838, doi:10.1038/jid.2014.28 (2014).
- 433 9 Koks, S. *et al.* Psoriasis-Specific RNA Isoforms Identified by RNA-Seq Analysis of 173,446  
434 Transcripts. *Front Med (Lausanne)* **3**, 46, doi:10.3389/fmed.2016.00046 (2016).
- 435 10 Xue, F. *et al.* SRSF1 facilitates cytosolic DNA-induced production of type I interferons  
436 recognized by RIG-I. *PLoS One* **10**, e0115354, doi:10.1371/journal.pone.0115354 (2015).
- 437 11 Chen, L., Tovar-Corona, J. M. & Urrutia, A. O. Alternative splicing: a potential source of  
438 functional innovation in the eukaryotic genome. *Int J Evol Biol* **2012**, 596274,  
439 doi:10.1155/2012/596274 (2012).
- 440 12 Mudge, J. M. *et al.* The origins, evolution, and functional potential of alternative splicing in  
441 vertebrates. *Mol Biol Evol* **28**, 2949-2959, doi:10.1093/molbev/msr127 (2011).
- 442 13 Li, J. *et al.* SFMetaDB: a comprehensive annotation of mouse RNA splicing factor RNA-Seq  
443 datasets. *Database (Oxford)* **2017**, doi:10.1093/database/bax071 (2017).
- 444 14 Rustici, G. *et al.* ArrayExpress update--trends in database growth and links to data analysis  
445 tools. *Nucleic Acids Res* **41**, D987-990, doi:10.1093/nar/gks1174 (2013).
- 446 15 Edgar, R., Domrachev, M. & Lash, A. E. Gene Expression Omnibus: NCBI gene expression  
447 and hybridization array data repository. *Nucleic Acids Res* **30**, 207-210 (2002).
- 448 16 Ippagunta, S. K. *et al.* Keratinocytes contribute intrinsically to psoriasis upon loss of Tnfr1  
449 function. *Proc Natl Acad Sci U S A* **113**, E6162-E6171, doi:10.1073/pnas.1606996113  
450 (2016).
- 451 17 Lee, Y. A. *et al.* Genomewide scan in german families reveals evidence for a novel psoriasis-  
452 susceptibility locus on chromosome 19p13. *American journal of human genetics* **67**, 1020-  
453 1024, doi:10.1086/303075 (2000).
- 454 18 Yu, P. & Shaw, C. A. An efficient algorithm for accurate computation of the Dirichlet-  
455 multinomial log-likelihood function. *Bioinformatics* **30**, 1547-1554,  
456 doi:10.1093/bioinformatics/btu079 (2014).

- 457 19 Benjamini, Y. & Hochberg, Y. Controlling the False Discovery Rate: A Practical and  
458 Powerful Approach to Multiple Testing. *Journal of the Royal Statistical Society. Series B*  
459 *(Methodological)* **57**, 289-300 (1995).
- 460 20 Kent, W. J. *et al.* The human genome browser at UCSC. *Genome Res* **12**, 996-1006,  
461 doi:10.1101/gr.229102. Article published online before print in May 2002 (2002).
- 462 21 Morhenn, V. B., Nelson, T. E. & Gruol, D. L. The rate of wound healing is increased in  
463 psoriasis. *Journal of dermatological science* **72**, 87-92, doi:10.1016/j.jdermsci.2013.06.001  
464 (2013).
- 465 22 Choi, J. H. *et al.* Absence of a human DnaJ protein hTid-1S correlates with aberrant actin  
466 cytoskeleton organization in lesional psoriatic skin. *The Journal of biological chemistry* **287**,  
467 25954-25963, doi:10.1074/jbc.M111.313809 (2012).
- 468 23 Coordinators, N. R. Database resources of the National Center for Biotechnology  
469 Information. *Nucleic Acids Res* **44**, D7-19, doi:10.1093/nar/gkv1290 (2016).
- 470 24 Ge, Z., Quek, B. L., Beemon, K. L. & Hogg, J. R. Polypyrimidine tract binding protein 1  
471 protects mRNAs from recognition by the nonsense-mediated mRNA decay pathway. *Elife* **5**,  
472 doi:10.7554/eLife.11155 (2016).
- 473 25 Gueroussov, S. *et al.* An alternative splicing event amplifies evolutionary differences  
474 between vertebrates. *Science* **349**, 868-873, doi:10.1126/science.aaa8381 (2015).
- 475 26 Fish, L. *et al.* Muscleblind-like 1 suppresses breast cancer metastatic colonization and  
476 stabilizes metastasis suppressor transcripts. *Genes & development* **30**, 386-398,  
477 doi:10.1101/gad.270645.115 (2016).
- 478 27 Wu, L. *et al.* The differential regulation of human ACT1 isoforms by Hsp90 in IL-17  
479 signaling. *Journal of immunology* **193**, 1590-1599, doi:10.4049/jimmunol.1400715 (2014).
- 480 28 Lee, T. L. *et al.* An alternatively spliced IL-15 isoform modulates abrasion-induced  
481 keratinocyte activation. *The Journal of investigative dermatology* **135**, 1329-1337,  
482 doi:10.1038/jid.2015.17 (2015).
- 483 29 Bhaduri, A. *et al.* Network Analysis Identifies Mitochondrial Regulation of Epidermal  
484 Differentiation by MPZL3 and FDXR. *Dev Cell* **35**, 444-457,  
485 doi:10.1016/j.devcel.2015.10.023 (2015).
- 486 30 Labott, A. T. & Lopez-Pajares, V. Epidermal differentiation gene regulatory networks  
487 controlled by MAF and MAFB. *Cell Cycle* **15**, 1405-1409,  
488 doi:10.1080/15384101.2016.1172148 (2016).
- 489 31 Barkefors, I. *et al.* Exocyst complex component 3-like 2 (EXOC3L2) associates with the  
490 exocyst complex and mediates directional migration of endothelial cells. *The Journal of*  
491 *biological chemistry* **286**, 24189-24199, doi:10.1074/jbc.M110.212209 (2011).
- 492 32 Sottile, J. Regulation of angiogenesis by extracellular matrix. *Biochimica et biophysica acta*  
493 **1654**, 13-22, doi:10.1016/j.bbcan.2003.07.002 (2004).
- 494 33 Kilarski, W. W. & Gerwins, P. A new mechanism of blood vessel growth - hope for new  
495 treatment strategies. *Discov Med* **8**, 23-27 (2009).
- 496 34 Uhlen, M. *et al.* Proteomics. Tissue-based map of the human proteome. *Science* **347**,  
497 1260419, doi:10.1126/science.1260419 (2015).
- 498 35 Roffers-Agarwal, J., Xanthos, J. B. & Miller, J. R. Regulation of actin cytoskeleton  
499 architecture by Eps8 and Abi1. *BMC Cell Biol* **6**, 36, doi:10.1186/1471-2121-6-36 (2005).
- 500 36 Belleudi, F., Scrofani, C., Torrisi, M. R. & Mancini, P. Polarized endocytosis of the  
501 keratinocyte growth factor receptor in migrating cells: role of SRC-signaling and cortactin.  
502 *PLoS One* **6**, e29159, doi:10.1371/journal.pone.0029159 (2011).

- 503 37 Eaton, L. H. *et al.* Guttate psoriasis is associated with an intermediate phenotype of impaired  
504 Langerhans cell migration. *British Journal of Dermatology* **171**, 409-411,  
505 doi:10.1111/bjd.12960 (2014).
- 506 38 Wagner, S. M. & Sabourin, L. A. A novel role for the Ste20 kinase SLK in adhesion  
507 signaling and cell migration. *Cell Adh Migr* **3**, 182-184 (2009).
- 508 39 Bonnans, C., Chou, J. & Werb, Z. Remodelling the extracellular matrix in development and  
509 disease. *Nat Rev Mol Cell Biol* **15**, 786-801, doi:10.1038/nrm3904 (2014).
- 510 40 Moulding, D. A., Record, J., Malinova, D. & Thrasher, A. J. Actin cytoskeletal defects in  
511 immunodeficiency. *Immunol Rev* **256**, 282-299, doi:10.1111/imr.12114 (2013).
- 512 41 Shaw, A. C., Goldstein, D. R. & Montgomery, R. R. Age-dependent dysregulation of innate  
513 immunity. *Nat Rev Immunol* **13**, 875-887, doi:10.1038/nri3547 (2013).
- 514 42 Noiret, M. *et al.* Ptbp1 and Exosc9 knockdowns trigger skin stability defects through  
515 different pathways. *Developmental Biology* **409**, 489-501, doi:10.1016/j.ydbio.2015.11.002  
516 (2016).
- 517 43 Valdimarsson, H., Bake, B. S., Jonsdottr, I. & Fry, L. Psoriasis: a disease of abnormal  
518 Keratinocyte proliferation induced by T lymphocytes. *Immunol Today* **7**, 256-259,  
519 doi:10.1016/0167-5699(86)90005-8 (1986).
- 520 44 Candi, E., Schmidt, R. & Melino, G. The cornified envelope: a model of cell death in the  
521 skin. *Nat Rev Mol Cell Biol* **6**, 328-340, doi:10.1038/nrm1619 (2005).
- 522 45 Dobin, A. *et al.* STAR: ultrafast universal RNA-seq aligner. *Bioinformatics* **29**, 15-21,  
523 doi:10.1093/bioinformatics/bts635 (2013).
- 524 46 Anders, S., Pyl, P. T. & Huber, W. HTSeq--a Python framework to work with high-  
525 throughput sequencing data. *Bioinformatics* **31**, 166-169, doi:10.1093/bioinformatics/btu638  
526 (2015).
- 527 47 Hsu, F. *et al.* The UCSC known genes. *Bioinformatics* **22**, 1036-1046 (2006).
- 528 48 Casella, G. & Berger, R. L. *Statistical inference*. 2 edn, (Thomson Learning, 2001).
- 529 49 Katz, Y., Wang, E. T., Airoidi, E. M. & Burge, C. B. Analysis and design of RNA  
530 sequencing experiments for identifying isoform regulation. *Nat Methods* **7**, 1009-1015  
531 (2010).
- 532 50 Ashburner, M. *et al.* Gene ontology: tool for the unification of biology. The Gene Ontology  
533 Consortium. *Nat Genet* **25**, 25-29, doi:10.1038/75556 (2000).
- 534 51 Katoh, K., Misawa, K., Kuma, K. & Miyata, T. MAFFT: a novel method for rapid multiple  
535 sequence alignment based on fast Fourier transform. *Nucleic Acids Res* **30**, 3059-3066  
536 (2002).
- 537 52 Anders, S. & Huber, W. Differential expression of RNA-Seq data at the gene level—the  
538 DESeq package. *Heidelberg, Germany: European Molecular Biology Laboratory (EMBL)*  
539 (2012).
- 540 53 Lamb, J. *et al.* The Connectivity Map: using gene-expression signatures to connect small  
541 molecules, genes, and disease. *Science* **313**, 1929-1935, doi:10.1126/science.1132939 (2006).
- 542 54 Sirota, M. *et al.* Discovery and preclinical validation of drug indications using compendia of  
543 public gene expression data. *Sci Transl Med* **3**, 96ra77, doi:10.1126/scitranslmed.3001318  
544 (2011).
- 545

## 546 Acknowledgments

547 This work was supported by startup funding to P.Y. from the ECE department and Texas A&M  
548 Engineering Experiment Station/Dwight Look College of Engineering at Texas A&M University  
549 and by funding from TEES-AgriLife Center for Bioinformatics and Genomic Systems Engineering  
550 (CBGSE) at Texas A&M University, by TEES seed grant, and by Texas A&M University-CAPES  
551 Research Grant Program.

#### 552 **Author Contributions**

553 J.L. carried out the major analyses. P.Y. supervised the analyses. J.L. and P.Y. wrote the  
554 manuscript. Both authors reviewed and approved the final manuscript.

#### 555 **Additional Information**

556 **Competing Interests:** The authors declare that they have no competing interests.

557



558 **FIGURE LEGENDS**

559 **Figure 1. Number of DAS events for the seven splicing event types.** DAS analyses were  
560 performed for the mouse and human datasets, involving seven splicing event types: ES, A5SS,  
561 A3SS, ME, IR, AFE, and ALE. Under  $|\Delta\Psi| > 0.05$  and  $q < 0.05$ , the pie charts depict the  
562 number of DAS events for the seven splicing event types. (a) DAS analysis revealed 609 DAS  
563 events in the *Tnip1* KO mouse model dataset. (b) DAS analysis revealed 606 DAS events in the  
564 human psoriasis dataset.

565 **Figure 2. UCSC genome browser tracks visualization for the DAS events in *Exoc1/EXO1***  
566 **and *Fbln2/FBLN2*.** The bigWigs UCSC genome browser tracks of the mapped reads in mice and  
567 humans were generated to visualize DAS events. To increase interpretability for the human  
568 psoriasis dataset, mapped reads were collapsed within groups of lesional psoriatic samples (P) and  
569 normal skin samples (N). The figures depict the expanded regions spanning over splicing events  
570 in the UCSC genome browser. (a) Visualization of the DAS event in *Exoc1/EXO1*. The psoriatic  
571 samples have more inclusion of variable exons in both mice and humans. (b) Visualization of the  
572 DAS event in *Fbln2/FBLN2*. The psoriatic samples have less inclusion of variable exons in both  
573 mice and humans.

574 **Figure 3. Heat map of PSI values for alternative ES events in the *Tnip1* KO mouse model**  
575 **dataset and the human psoriasis dataset.** Yellow: high PSI. Blue: low PSI. (a) The heat map of  
576 the PSI values between three KO samples and three wild-type samples in mice. 64 of 181 ES  
577 events have more inclusion of variable exons in psoriasis, and 117 ES events have less inclusion  
578 of variable exons in psoriasis. (b) Heat map of the PSI values between 92 lesional psoriatic skins  
579 and 82 normal control skins in humans. 98 of 217 ES events have more inclusion of variable exons  
580 in psoriasis, and 119 ES events have less inclusion of variable exons in psoriasis.

581 **Figure 4. Venn diagram of the genes with DAS events in the *Tnip1* KO mouse model dataset**  
582 **and the human psoriasis dataset.**

583 To investigate the genes with DAS events, we ended up with 667 genes in the *Tnip1* KO mouse  
584 model dataset and 607 genes in the human psoriasis dataset. Mapping the human gene symbols to  
585 mouse homologous genes using HomoloGene resulted in 89 common homologous genes with  
586 DAS events in both species. Alternatively, 578 genes have DAS events in mice but not humans.  
587 On the other hand, 518 genes have DAS events in humans but not mice. Taking 12,233  
588 homologous genes expressed in both species as the background genes, the Fisher's exact test  
589 showed significant enrichment of the common homologous genes with  $p = 1.7 \times 10^{-32}$ .

590 **Figure 5. Splicing signature comparison workflow for the discovery of candidate SFs that**  
591 **regulate alternative splicing in psoriasis.** (a) The splicing events (e.g., E1) with a more  
592 frequently included variable exon in the perturbed group than in wild-type (WT) or control (CL)  
593 are denoted by upward arrows ( $\Delta\Psi > 0.05$  and  $q < 0.05$ ). The opposite cases with  $\Delta\Psi < -0.05$   
594 and  $q < 0.05$  are denoted by downward arrows (e.g., E2). The rest of the cases are considered  
595 unchanged and are denoted by horizontal bars (e.g., E3). (b) A splicing event is considered  
596 positively regulated by an SF (notated as +) when there is an increase/decrease in the inclusion of  
597 the variable exon upon the over/underexpression of the SF (e.g., E1, E6, and E3'). Alternatively,  
598 a splicing event is considered negatively regulated by an SF (notated as -) when there is a  
599 decrease/increase in the inclusion of the variable exon upon the over/underexpression of the SF  
600 (e.g. E3, E1', and E6'). The rest of the events are considered not regulated by the SF and are  
601 notated as 0. A splicing signature is defined as the vector of +/-/0s, indicating how an SF  
602 regulates a given set of alternative splicing events. (c) Splicing signatures were first calculated for  
603 the SF perturbation (KO/KD/OE) datasets and the *Tnip1* KO mouse/human psoriasis datasets. A

604 3×3 contingency table was tabulated for the common splicing events between an SF perturbation  
605 dataset and the *Tnip1* KO mouse dataset or the human psoriasis dataset. This contingency table  
606 can be collapsed into 2×2 tables for testing enrichment of + + events and – – events, respectively,  
607 using Fisher’s exact test.  
608

609 **Tables**

610 **Table 1. Identification of the conserved splicing events between the *Tnip1* KO mouse model**  
 611 **dataset and the human psoriasis dataset.** The column “PSI consistency” marks ‘Y’ for the 18  
 612 splicing events conserved in both mice and humans.

| Gene in human | Gene in mouse | $\Delta\Psi$ in human | $\Delta\Psi$ in mouse | Isoform conservation        | PSI consistency |
|---------------|---------------|-----------------------|-----------------------|-----------------------------|-----------------|
| ABI1          | Abi1          | -0.133                | -0.095                | both                        | Y               |
| ARHGAP12      | Arhgap12      | -0.069                | -0.309                | both                        | Y               |
| ATP5C1        | Atp5c1        | 0.104                 | 0.259                 | both                        | Y               |
| CTTN          | Ctnn          | -0.054                | -0.159                | both                        | Y               |
| DNM1L         | Dnm1l         | -0.096                | -0.221                | both                        | Y               |
| EXOC1         | Exoc1         | 0.186                 | 0.198                 | both                        | Y               |
| FBLN2         | Fbln2         | -0.172                | -0.173                | both                        | Y               |
| FNBP1         | Fnbp1         | -0.137                | -0.269                | both                        | Y               |
| GOLGA2        | Golga2        | -0.099                | -0.144                | both                        | Y               |
| GOLGA4        | Golga4        | 0.058                 | 0.086                 | both                        | Y               |
| MYH11         | Myh11         | -0.064                | -0.225                | both                        | Y               |
| MYL6          | Myl6          | -0.101                | -0.294                | both                        | Y               |
| MYO1B         | Myo1b         | -0.109                | -0.206                | both                        | Y               |
| PAM           | Pam           | -0.096                | -0.327                | both                        | Y               |
| SEC31A        | Sec31a        | -0.105                | -0.115                | both                        | Y               |
| SLK           | Slk           | 0.107                 | 0.217                 | both                        | Y               |
| SPAG9         | Spag9         | -0.100                | -0.226                | both                        | Y               |
| ZMYND11       | Zmynd11       | 0.061                 | 0.365                 | both                        | Y               |
| AXL           | Axl           | -0.060                | 0.091                 | both                        | N               |
| DMKN          | Dmkn          | -0.180                | -0.078                | hs_inc=mm_excl <sup>a</sup> | N               |
| MLX           | Mlx           | 0.089                 | -0.132                | both                        | N               |
| MPRIP         | Mprrip        | -0.127                | 0.187                 | both                        | N               |
| NDRG2         | Ndr2          | 0.126                 | -0.159                | both                        | N               |
| POSTN         | Postn         | -0.072                | -0.195                | hs_inc=mm_excl <sup>b</sup> | N               |

613  
 614 <sup>a</sup> The  $\Delta\Psi$  s are of the same negative signs, meaning psoriatic samples have more exclusion for the  
 615 splicing events in DMKN/Dmkn of both species. However, the isoform with more inclusion of the  
 616 variable exon in the human (hs\_inc) is conserved with the isoform with more exclusion of variable  
 617 exon in the mouse (mm\_excl). Therefore, the event is not conserved.

618 <sup>b</sup> The  $\Delta\Psi$  s are of the same negative signs, meaning psoriatic samples have more exclusion for the  
619 splicing events in POSTN/Postn of both species. However, the isoform with more inclusion of the  
620 variable exon in the human (hs\_inc) is conserved with the isoform with more exclusion of variable  
621 exon in the mouse (mm\_excl). Therefore, the event is not conserved.

a

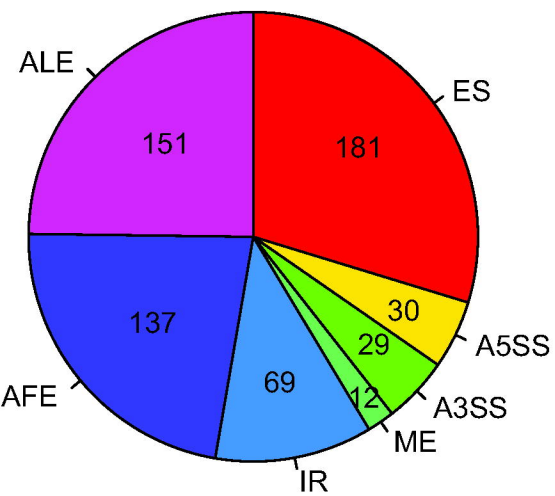

b

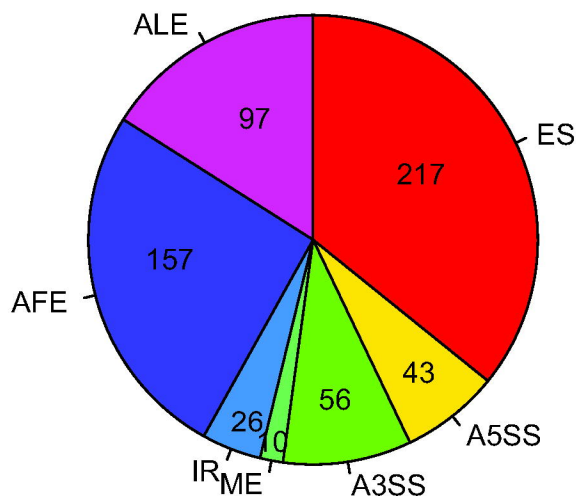

a

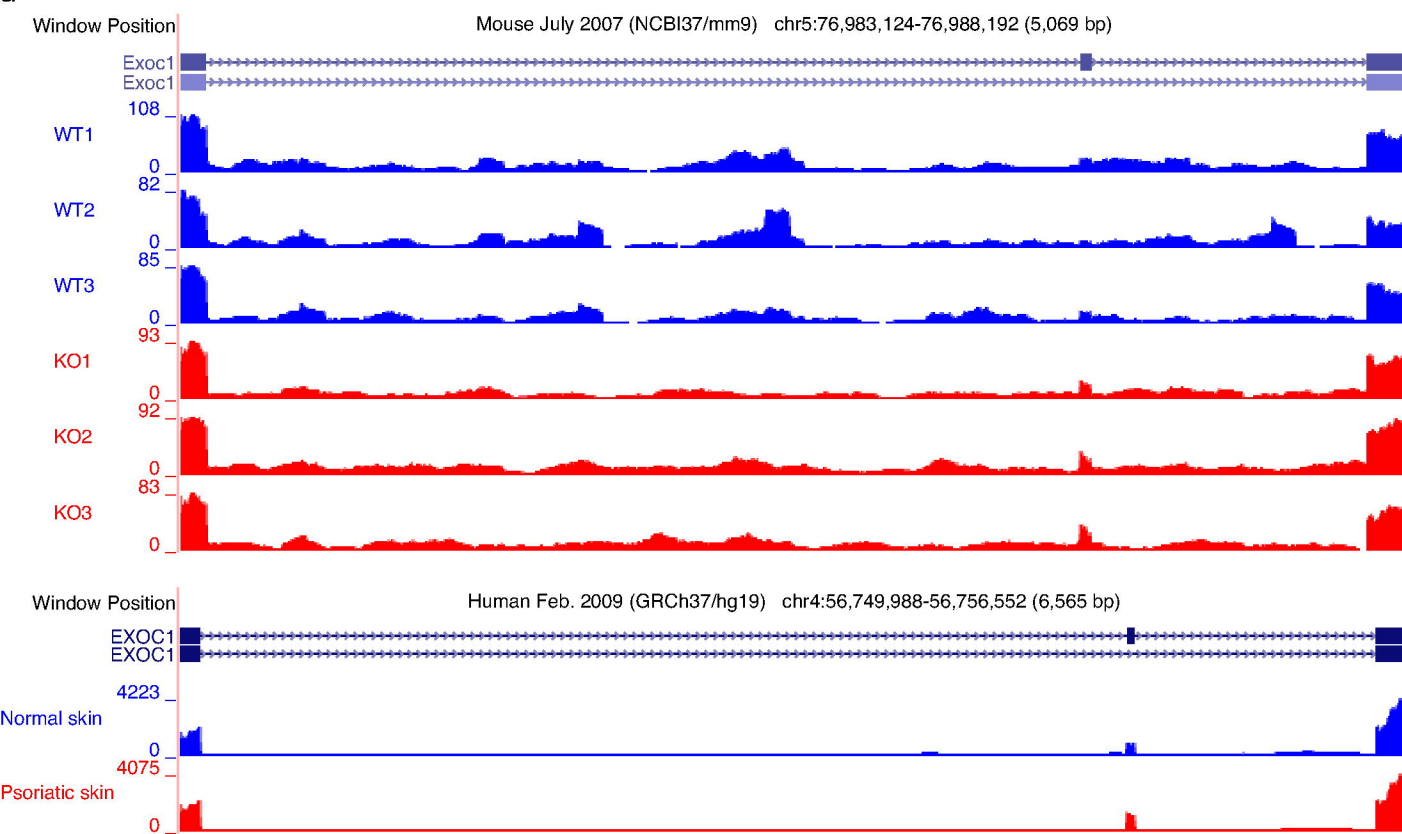

b

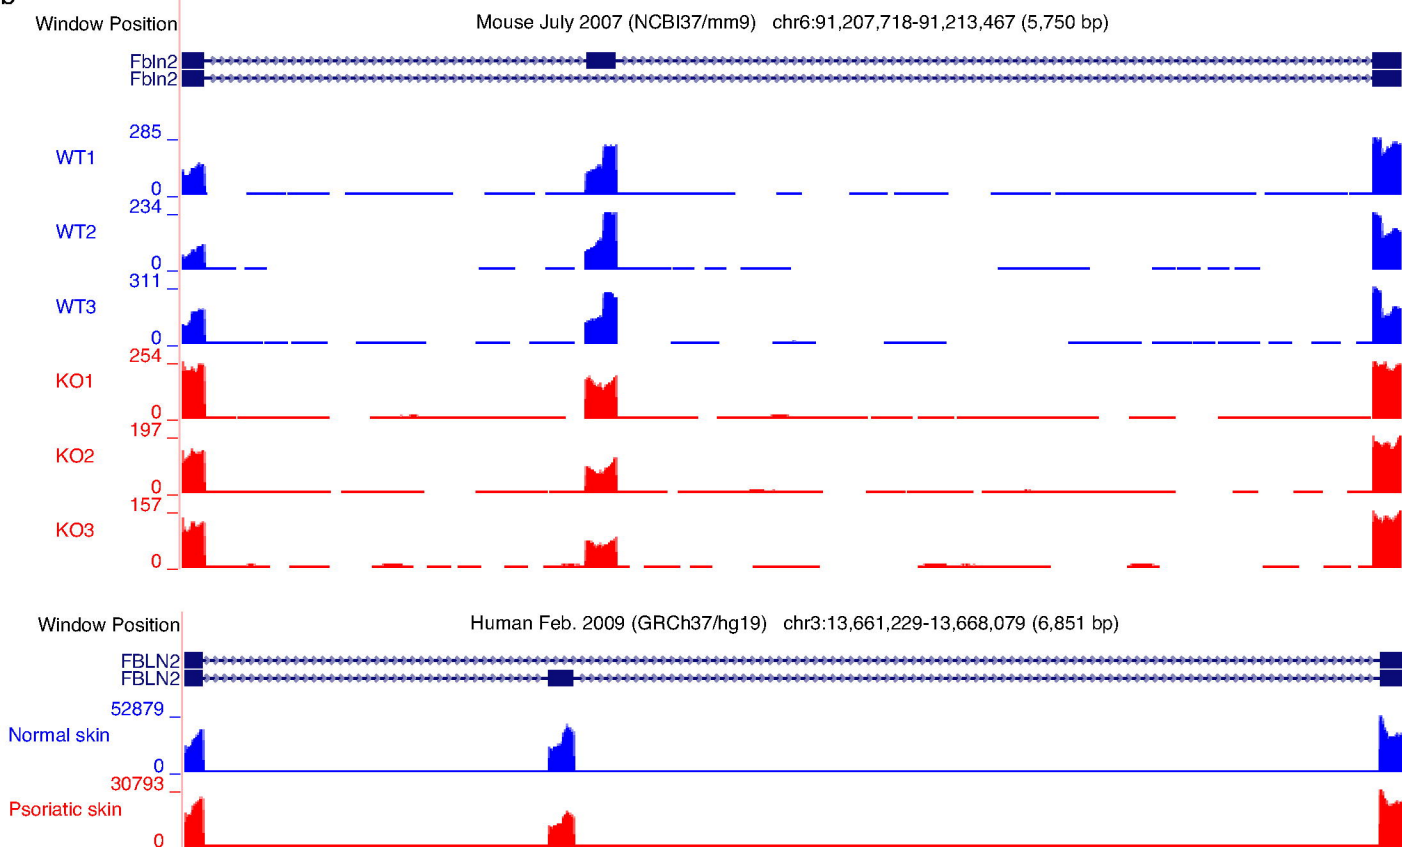

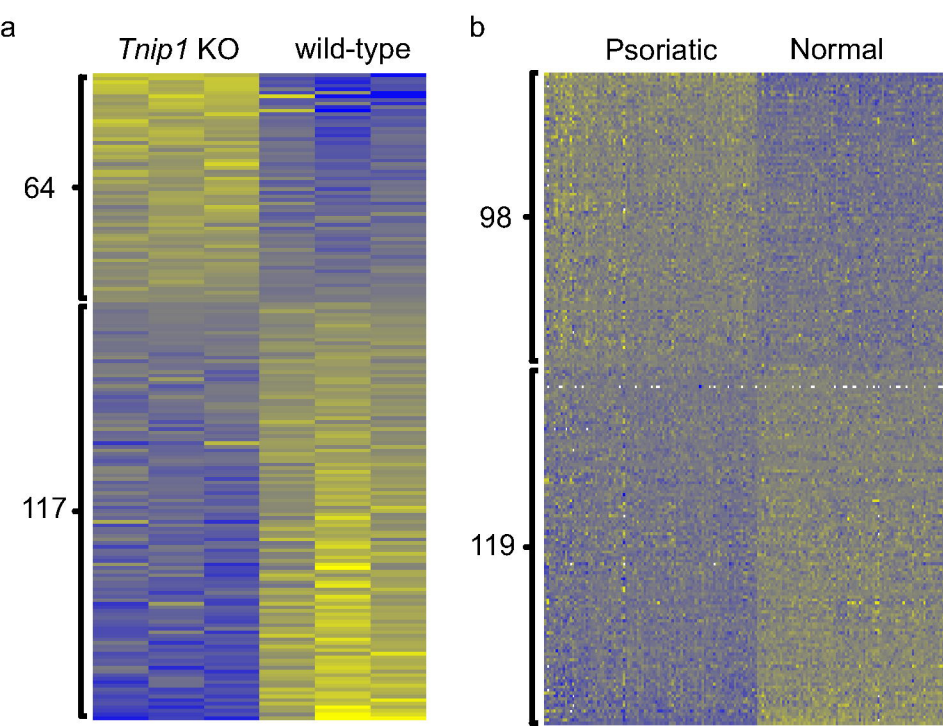



*Tnfr1* KO mouse model    human psoriasis dataset

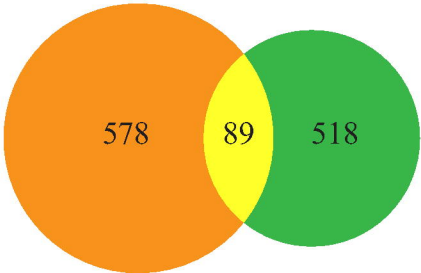

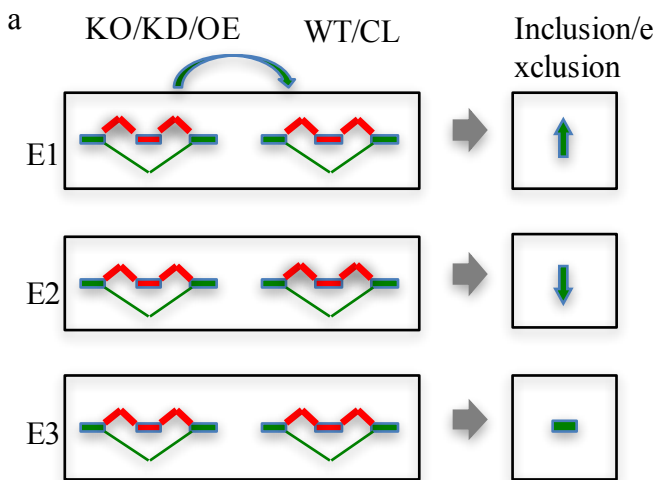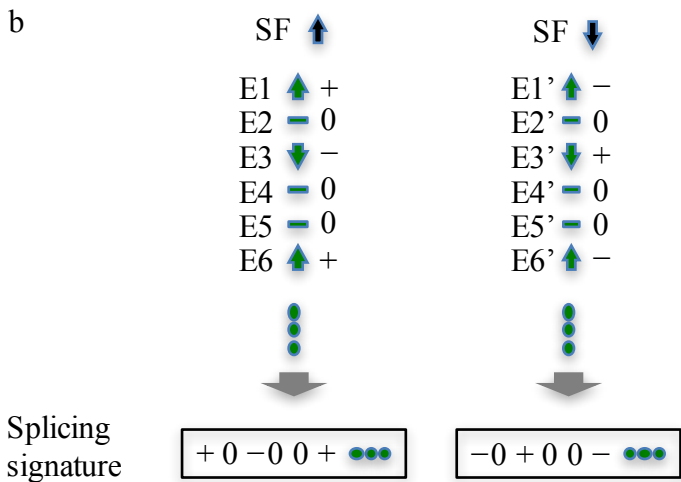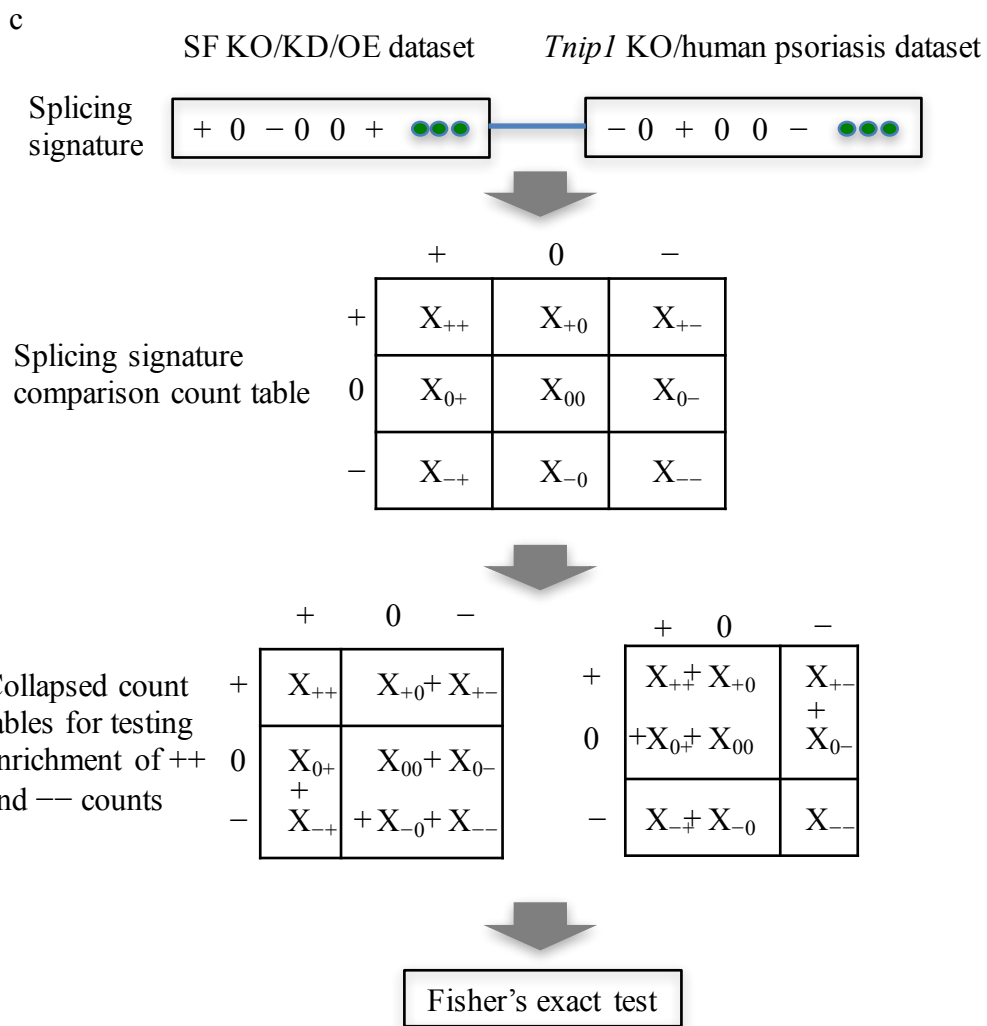

Source: https://www.biorxiv.org/content/10.1101/259291v1.full.pdf
